# Supplementary material
Source: ML conference proceedings conference paper supplement (https://proceedings.mlr.press/v32/yangd14.html)
Supplement: Supplementary file 1 [file yangd14-supp.zip]

## Appendix

### A. Proof of Proposition 3

Consider an arbitrary parameter  $\tilde{\mu} = \sum_i \tilde{c}_i \tilde{\mathbf{a}}_i$  in the feasible set of parameters that satisfy the constraint of (6).

Let  $\mathcal{P}_{\mathcal{M}}$  denote the matrix corresponding to the projection operator for the subspace  $\mathcal{M}$ .

Since  $\tilde{\mu}$  should satisfy the constraint of  $\mathcal{R}^*(\hat{\mu}_n - \tilde{\mu}) \leq \lambda_n$ , for any fixed index  $i$  in the atoms of  $\hat{\mu}_n$ ,

$$\begin{aligned} & \mathcal{R}(\mathcal{P}_{\mathbf{a}_i^*}(\hat{\mu}_n - \tilde{\mu})) \\ &= \mathcal{R}\left(\sum_j \tilde{c}_j \mathcal{P}_{\mathbf{a}_i^*}(\tilde{\mathbf{a}}_j) - c_i^* \mathbf{a}_i^*\right) \leq \lambda_n, \end{aligned}$$

which implies  $\max\{c_i^* - \lambda_n, 0\} \leq \mathcal{R}\left(\sum_j \tilde{c}_j \mathcal{P}_{\mathbf{a}_i^*}(\tilde{\mathbf{a}}_j)\right)$ . By summing over all  $i$ , we obtain

$$\begin{aligned} \mathcal{R}(\hat{\mu}) &= \sum_i \max\{c_i^* - \lambda_n, 0\} \leq \sum_i \mathcal{R}\left(\sum_j \tilde{c}_j \mathcal{P}_{\mathbf{a}_i^*}(\tilde{\mathbf{a}}_j)\right) \\ &\stackrel{(i)}{=} \mathcal{R}\left(\sum_j \tilde{c}_j \sum_i \mathcal{P}_{\mathbf{a}_i^*}(\tilde{\mathbf{a}}_j)\right) = \mathcal{R}\left(\sum_j \tilde{c}_j \tilde{\mathbf{a}}_j\right) = \mathcal{R}(\tilde{\mu}). \end{aligned}$$

Finally, since we can simply verify that  $\hat{\mu}$  is also feasible, we can conclude that  $\hat{\mu}$  is the optimal of (6).

### B. Proof of Theorem 1

Let  $\Delta := \hat{\mu} - \mu^*$  be the error vector that we are interested in.

$$\begin{aligned} \mathcal{R}^*(\hat{\mu} - \mu^*) &= \mathcal{R}^*(\hat{\mu} - \hat{\mu}_n + \hat{\mu}_n - \mu^*) \\ &\leq \mathcal{R}^*(\hat{\mu}_n - \hat{\mu}) + \mathcal{R}^*(\hat{\mu}_n - \mu^*) \leq 2\lambda_n \end{aligned}$$

By the fact that  $\mu_{\mathcal{M}^\perp}^* = \mathbf{0}$ , and the decomposability of  $\mathcal{R}$  with respect to  $(\mathcal{M}, \mathcal{M}^\perp)$ ,

$$\begin{aligned} & \mathcal{R}(\mu^*) \\ &= \mathcal{R}(\mu^*) + \mathcal{R}[\Pi_{\mathcal{M}^\perp}(\Delta)] - \mathcal{R}[\Pi_{\mathcal{M}^\perp}(\Delta)] \\ &= \mathcal{R}[\mu^* + \Pi_{\mathcal{M}^\perp}(\Delta)] - \mathcal{R}[\Pi_{\mathcal{M}^\perp}(\Delta)] \\ &\stackrel{(i)}{\leq} \mathcal{R}[\mu^* + \Pi_{\mathcal{M}^\perp}(\Delta) + \Pi_{\mathcal{M}}(\Delta)] + \mathcal{R}[\Pi_{\mathcal{M}}(\Delta)] \\ &\quad - \mathcal{R}[\Pi_{\mathcal{M}^\perp}(\Delta)] \\ &= \mathcal{R}[\mu^* + \Delta] + \mathcal{R}[\Pi_{\mathcal{M}}(\Delta)] - \mathcal{R}[\Pi_{\mathcal{M}^\perp}(\Delta)] \quad (18) \end{aligned}$$

where the equality (i) holds by the triangle inequality of norm. Since (6) minimizes  $\mathcal{R}(\hat{\mu})$ , we have  $\mathcal{R}(\mu^* + \Delta) = \mathcal{R}(\hat{\mu}) \leq \mathcal{R}(\mu^*)$ . Combining this inequality with (18),

$$\mathcal{R}[\Pi_{\mathcal{M}^\perp}(\Delta)] \leq \mathcal{R}[\Pi_{\mathcal{M}}(\Delta)]. \quad (19)$$

Moreover, by Hölder's inequality and the decomposability of  $\mathcal{R}(\cdot)$ ,

$$\begin{aligned} \|\Delta\|_2^2 &= \langle \Delta, \Delta \rangle \leq \mathcal{R}^*(\Delta) \mathcal{R}(\Delta) \leq 2\lambda_n \mathcal{R}(\Delta) \\ &= 2\lambda_n [\mathcal{R}(\Pi_{\mathcal{M}}(\Delta)) + \mathcal{R}(\Pi_{\mathcal{M}^\perp}(\Delta))] \leq 4\lambda_n \mathcal{R}(\Pi_{\mathcal{M}}(\Delta)) \\ &\leq 4\lambda_n \Psi(\bar{\mathcal{M}}) \|\Pi_{\mathcal{M}}(\Delta)\|_2 \quad (20) \end{aligned}$$

where  $\Psi(\bar{\mathcal{M}})$  is a simple notation for  $\Psi(\bar{\mathcal{M}}, \|\cdot\|_2)$ .

Since the projection operator is defined in terms of  $\|\cdot\|_2$  norm, it is non-expansive:  $\|\Pi_{\mathcal{M}}(\Delta)\|_2 \leq \|\Delta\|_2$ . Therefore, by (20), we have

$$\|\Pi_{\mathcal{M}}(\Delta)\|_2 \leq 4\lambda_n \Psi(\bar{\mathcal{M}}), \quad (21)$$

and plugging it back into (20) yields the error bound (10).

Finally, (11) is straightforward from (19) and (21)

$$\begin{aligned} \mathcal{R}(\Delta) &\leq 2\mathcal{R}(\Pi_{\mathcal{M}}(\Delta)) \\ &\leq 2\Psi(\bar{\mathcal{M}}) \|\Pi_{\mathcal{M}}(\Delta)\|_2 \leq 8\lambda_n \Psi(\bar{\mathcal{M}})^2. \end{aligned}$$

### C. Proof of corollaries: Covariance Estimation in Section 4.1

In order to leverage Theorem 1, two ingredients need to be specified: (i) the convergence rate of  $\mathcal{R}^*(\hat{\mu}_n - \mu^*)$  for  $\lambda_n$  to satisfy  $\lambda_n \geq \mathcal{R}^*(\hat{\mu}_n - \mu^*)$ , and (ii) the compatibility constant  $\Psi(\bar{\mathcal{M}})$ . In each corollary, we are going to show how these two components can be computed.

#### C.1. Proof of Corollary 1

For this case, we can directly appeal to the well known bound (e.g., the Lemma 1 of (Ravikumar et al., 2011)): Consider the following event:

$$\begin{aligned} & P(\|\hat{\Sigma}_n - \Sigma\|_{\infty, \text{off}} > \delta) \\ & \leq 4 \exp\left(-\frac{n\delta^2}{3200(\max_i \Sigma_{ii})^2} + \log p^2\right). \end{aligned}$$

By setting  $\delta = 40(\max_i \Sigma_{ii}) \sqrt{\frac{2\tau \log p}{n}}$ , we see that the choice of  $\lambda_n$  is valid with probability at least  $1 - C_1 \exp(-C_2 n \lambda_n^2)$ .

For the second ingredient, let  $\mathcal{M} = \bar{\mathcal{M}}$  correspond to the support of  $\Sigma^*$ . We have  $\psi(\bar{\mathcal{M}}, \|\cdot\|_2) = \sqrt{s}$ , where  $s$  is the cardinality of the support of  $\Sigma^*$ .

#### C.2. Proof of Corollary 2

$\mathcal{R}^*(\hat{\Sigma}_n - \Sigma^*) = \max_{l=1, \dots, L} \left\| [\hat{\Sigma}_n]_{G_l} - [\Sigma^*]_{G_l} \right\|_{\nu^*}$ . For a given entry  $(i, j)$  we have

$$P(|[\hat{\Sigma}_n]_{ij} - \Sigma_{ij}^*| > t) \leq C_1 \exp(-C_2 n t^2).$$

For a given group  $G_l$ , by union bound over the group elements, we have

$$\begin{aligned} P(|[\widehat{\Sigma}_n]_{ij} - \Sigma_{ij}^*| > t \text{ for all } (i, j) \in G_l) \\ \leq C_1 \exp(-C_2 n t^2 + \log d). \end{aligned}$$

This implies that

$$P(\|[\widehat{\Sigma}_n]_{G_l} - \Sigma_{G_l}^*\|_{\nu^*} > t d^{1/\nu^*}) \leq C_1 \exp(-C_2 n t^2 + \log d).$$

By a union bound over all groups we obtain

$$\begin{aligned} P\left(\max_{l=1, \dots, L} \|[\widehat{\Sigma}_n]_{G_l} - \Sigma_{G_l}^*\|_2 > t d^{1/\nu^*}\right) \\ \leq C_1 \exp(-C_2 n t^2 + \log d + \log L). \end{aligned}$$

This yields

$$\begin{aligned} P\left(\max_{l=1, \dots, L} \|[\widehat{\Sigma}_n]_{G_l} - \Sigma_{G_l}^*\|_2 > \delta\right) \\ \leq C_1 \exp(-C_2 n d^{-2/\nu^*} \delta^2 + \log d + \log L). \end{aligned}$$

We conclude by setting  $\delta = d^{1/\nu^*} \sqrt{(\log d + \log L)/n}$ . Let  $\mathcal{M} = \bar{\mathcal{M}}$  correspond to the support of  $\Sigma^*$ , which can be written as a union of groups in  $\mathcal{G}$ . Since  $\nu \geq 2$ , we have  $\psi(\bar{\mathcal{M}}, \|\cdot\|_F) = \sqrt{k}$ .

## D. Proof of Theorem 2

In this proof, we consider the matrix parameter such as the covariance. Basically, the Frobenius norm can be simply replaced by  $\ell_2$  norm for the vector parameters. Let  $\Delta_\alpha := \widehat{\mu}_\alpha - \mu_\alpha^*$ , and  $\Delta := \widehat{\mu} - \mu^* = \sum_{\alpha \in I} \Delta_\alpha$ . The error bound (14) can be easily shown from the assumption in the statement with the constraint of (13). For every  $\alpha \in I$ ,

$$\begin{aligned} \mathcal{R}_\alpha^*(\Delta) &= \mathcal{R}_\alpha^*(\widehat{\mu} - \mu^*) = \mathcal{R}_\alpha^*(\widehat{\mu} - \widehat{\mu}_n + \widehat{\mu}_n - \mu^*) \\ &\leq \mathcal{R}_\alpha^*(\widehat{\mu}_n - \widehat{\mu}) + \mathcal{R}_\alpha^*(\widehat{\mu}_n - \mu^*) \leq 2\lambda_\alpha. \end{aligned} \quad (22)$$

By the similar reasoning as in (18) with the fact that  $\Pi_{\mathcal{M}_\alpha^\perp}(\mu_\alpha^*) = \mathbf{0}$  in (C3), and the decomposability of  $\mathcal{R}_\alpha$  with respect to  $(\mathcal{M}_\alpha, \bar{\mathcal{M}}_\alpha^\perp)$ , we have

$$\begin{aligned} \mathcal{R}_\alpha(\mu_\alpha^*) &\leq \mathcal{R}_\alpha[\mu_\alpha^* + \Delta_\alpha] + \mathcal{R}_\alpha[\Pi_{\bar{\mathcal{M}}_\alpha}(\Delta_\alpha)] \\ &\quad - \mathcal{R}_\alpha[\Pi_{\mathcal{M}_\alpha^\perp}(\Delta_\alpha)]. \end{aligned} \quad (23)$$

Since  $\{\widehat{\mu}_\alpha\}_{\alpha \in I}$  minimizes the objective function of (13),

$$\sum_{\alpha \in I} \lambda_\alpha \mathcal{R}_\alpha(\widehat{\mu}_\alpha) \leq \sum_{\alpha \in I} \lambda_\alpha \mathcal{R}_\alpha(\mu_\alpha^*).$$

Combining this inequality with (23), we have

$$\begin{aligned} \sum_{\alpha \in I} \lambda_\alpha \mathcal{R}_\alpha(\widehat{\mu}_\alpha) &\leq \sum_{\alpha \in I} \lambda_\alpha \left\{ \mathcal{R}_\alpha(\mu_\alpha^* + \Delta_\alpha) \right. \\ &\quad \left. + \mathcal{R}_\alpha[\Pi_{\bar{\mathcal{M}}_\alpha}(\Delta_\alpha)] - \mathcal{R}_\alpha[\Pi_{\mathcal{M}_\alpha^\perp}(\Delta_\alpha)] \right\}, \end{aligned}$$

which implies

$$\sum_{\alpha \in I} \lambda_\alpha \mathcal{R}_\alpha[\Pi_{\bar{\mathcal{M}}_\alpha^\perp}(\Delta_\alpha)] \leq \sum_{\alpha \in I} \lambda_\alpha \mathcal{R}_\alpha[\Pi_{\bar{\mathcal{M}}_\alpha}(\Delta_\alpha)], \quad (24)$$

Now, for each structure  $\alpha \in I$ , we have an application of Hölder's inequality;  $|\langle \Delta, \Delta_\alpha \rangle| \leq \mathcal{R}_\alpha^*(\Delta) \mathcal{R}_\alpha(\Delta_\alpha) \leq 2\lambda_\alpha \mathcal{R}_\alpha(\Delta_\alpha)$  where the notation  $\langle A, B \rangle$  denotes the trace inner product,  $\text{trace}(A^\top B) = \sum_i \sum_j A_{ij} B_{ij}$ , and we use the pre-computed bound in (22). Then, the Frobenius error  $\|\Delta\|_F$  can be upper-bounded as follows:

$$\begin{aligned} \|\Delta\|_F^2 &= \langle \Delta, \Delta \rangle = \sum_{\alpha \in I} \langle \Delta, \Delta_\alpha \rangle \leq \sum_{\alpha \in I} |\langle \Delta, \Delta_\alpha \rangle| \\ &\leq 2 \sum_{\alpha \in I} \lambda_\alpha \mathcal{R}_\alpha(\Delta_\alpha) \leq 2 \sum_{\alpha \in I} \left\{ \lambda_\alpha \mathcal{R}_\alpha[\Pi_{\bar{\mathcal{M}}_\alpha}(\Delta_\alpha)] + \right. \\ &\quad \left. \lambda_\alpha \mathcal{R}_\alpha[\Pi_{\bar{\mathcal{M}}_\alpha^\perp}(\Delta_\alpha)] \right\} \leq 4 \sum_{\alpha \in I} \lambda_\alpha \mathcal{R}_\alpha[\Pi_{\bar{\mathcal{M}}_\alpha}(\Delta_\alpha)] \\ &\leq 4 \sum_{\alpha \in I} \lambda_\alpha \Psi(\bar{\mathcal{M}}_\alpha) \|\Pi_{\bar{\mathcal{M}}_\alpha}(\Delta_\alpha)\|_F \end{aligned} \quad (25)$$

where  $\Psi(\bar{\mathcal{M}}_\alpha)$  denotes the compatibility constant of space  $\bar{\mathcal{M}}_\alpha$  with respect to the Frobenius norm:  $\Psi(\bar{\mathcal{M}}_\alpha, \|\cdot\|_F)$ .

Here, we define a key notation in the error bound:

$$\Phi := \max_{\alpha \in I} \lambda_\alpha \Psi(\bar{\mathcal{M}}_\alpha).$$

Armed with this notation, (25) can be rewritten as

$$\|\Delta\|_F^2 \leq 4\Phi \sum_{\alpha \in I} \|\Pi_{\bar{\mathcal{M}}_\alpha}(\Delta_\alpha)\|_F \quad (26)$$

At this point, we directly appeal to the result in Proposition 2 of (Yang & Ravikumar, 2013) with a small modification:

**Proposition 4.** *Suppose that the structural incoherence condition (C4) as well as the condition (C3) hold. Then, we have*

$$2 \left| \sum_{\alpha < \beta} \langle \Delta_\alpha, \Delta_\beta \rangle \right| \leq \frac{1}{2} \sum_{\alpha \in I} \|\Delta_\alpha\|_F^2.$$

By this proposition, we have

$$\begin{aligned} \sum_{\alpha \in I} \|\Delta_\alpha\|_F^2 &\leq \|\Delta\|_F^2 + 2 \left| \sum_{\alpha < \beta} \langle \Delta_\alpha, \Delta_\beta \rangle \right| \\ &\leq \|\Delta\|_F^2 + \frac{1}{2} \sum_{\alpha \in I} \|\Delta_\alpha\|_F^2, \end{aligned}$$

which implies  $\sum_{\alpha \in I} \|\Delta_\alpha\|_F^2 \leq 2\|\Delta\|_F^2$ .

Moreover, since the projection operator is defined in terms of the Frobenius norm, it is non-expansive for all  $\alpha$ :

$\|\Pi_{\mathcal{M}_\alpha}(\Delta_\alpha)\|_F \leq \|\Delta_\alpha\|_F$ . Hence, we finally obtain

$$\begin{aligned} \left( \sum_{\alpha \in I} \|\Pi_{\mathcal{M}_\alpha}(\Delta_\alpha)\|_F \right)^2 &\leq \left( \sum_{\alpha \in I} \|\Delta_\alpha\|_F \right)^2 \\ &\leq |I| \sum_{\alpha \in I} \|\Delta_\alpha\|_F^2 \leq 8|I|\Phi \sum_{\alpha \in I} \|\Pi_{\mathcal{M}_\alpha}(\Delta_\alpha)\|_F, \end{aligned}$$

and therefore,

$$\sum_{\alpha \in I} \|\Pi_{\mathcal{M}_\alpha}(\Delta_\alpha)\|_F \leq 8|I|\Phi \quad (27)$$

The Frobenius norm error bound (16) can be derived by plugging (27) back into (26):

$$\|\Delta\|_F \leq 32|I|\Phi^2.$$

The proof of the final error bound (15) is straightforward from (24) and (27) as follows: for each fixed  $\alpha \in I$ ,

$$\begin{aligned} &\mathcal{R}_\alpha(\Delta_\alpha) \\ &\leq \frac{1}{\lambda_\alpha} \left\{ \lambda_\alpha \mathcal{R}_\alpha[\Pi_{\mathcal{M}_\alpha}(\Delta_\alpha)] + \lambda_\alpha \mathcal{R}_\alpha[\Pi_{\mathcal{M}_\alpha^\perp}(\Delta_\alpha)] \right\} \\ &\leq \frac{1}{\lambda_\alpha} \left\{ \lambda_\alpha \mathcal{R}_\alpha[\Pi_{\mathcal{M}_\alpha}(\Delta_\alpha)] + \sum_{\beta \in I} \lambda_\beta \mathcal{R}_\beta[\Pi_{\mathcal{M}_\beta}(\Delta_\beta)] \right\} \\ &\leq \frac{2}{\lambda_\alpha} \sum_{\beta \in I} \lambda_\beta \mathcal{R}_\beta[\Pi_{\mathcal{M}_\beta}(\Delta_\beta)] \\ &\leq \frac{2}{\lambda_\alpha} \sum_{\beta \in I} \lambda_\beta \Psi(\mathcal{M}_\beta) \|\Pi_{\mathcal{M}_\beta}(\Delta_\beta)\|_F \\ &\leq \frac{2\Phi}{\lambda_\alpha} \sum_{\beta \in I} \|\Pi_{\mathcal{M}_\beta}(\Delta_\beta)\|_F \leq \frac{16|I|\Phi^2}{\lambda_\alpha}, \end{aligned}$$

which completes the proof.

### D.1. Proof of Corollary 3

The proof for an element-wise sparse component is already proven in Section C.1. At the same time, for a low-rank component, we can directly appeal to the results for clean models (Agarwal et al., 2012):

$$\lambda_1 = 4\sqrt{\|\Sigma^*\|_2} \sqrt{\frac{p}{n}} \geq \|\Sigma^* - \hat{\Sigma}_n\|_2$$

with probability at least  $1 - 2\exp(-C_1 p)$ . The subspace compatibility of any matrix  $A$  with rank  $k$  can be easily derived as

$$\sup_{A \neq 0} \frac{\|A\|_*}{\|A\|_F} \leq \sqrt{k_1}.$$

## E. A Parallel Proximal algorithm for “Elem-Super-Moment” Estimation

The class of “Elem-Super-Moment” estimators solves

$$\begin{aligned} &\underset{\mu_1, \mu_2, \dots, \mu_{|I|}}{\text{minimize}} \quad \sum_{\alpha \in I} \lambda_\alpha \mathcal{R}_\alpha(\mu_\alpha) \\ &\text{s. t. } \mathcal{R}_\alpha^*(\hat{\mu}_n - \mu) \leq \lambda_\alpha \quad \text{for } \forall \alpha \in I \\ &\quad \mu = \sum_{\alpha \in I} \mu_\alpha. \end{aligned} \quad (28)$$

Let  $\boldsymbol{\mu} = (\mu_1, \mu_2, \dots, \mu_{|I|})$ . Consider the operators  $L_\alpha(\boldsymbol{\mu}) = \mu_\alpha$ , for  $\alpha \in I$  and  $L_{\text{tot}}(\boldsymbol{\mu}) = \sum_{\alpha \in I} \mu_\alpha$ . Then the problem can be rewritten as

$$\begin{aligned} &\underset{\boldsymbol{\mu}}{\text{minimize}} \quad \sum_{\alpha \in I} \lambda_\alpha \mathcal{R}_\alpha(L_\alpha(\boldsymbol{\mu})) \\ &\text{s. t. } \mathcal{R}_\alpha^*(\hat{\mu}_n - L_{\text{tot}}(\boldsymbol{\mu})) \leq \lambda_\alpha \quad \text{for } \forall \alpha \in I. \end{aligned} \quad (29)$$

For all  $\alpha \in I$  let

$$f_\alpha(\cdot) = \lambda_\alpha \mathcal{R}_\alpha(L_\alpha(\cdot)).$$

Define the indicator function of a set  $C$  as

$$\iota_C : x \mapsto \begin{cases} 0, & \text{if } x \in C \\ +\infty, & \text{if } x \notin C. \end{cases}$$

and let

$$g_\alpha(\cdot) = \iota_{(\mathcal{R}_\alpha^*(\hat{\mu}_n - L_{\text{tot}}(\cdot)) \leq \lambda_\alpha)}.$$

Then observe that (29) can be rewritten as

$$\begin{aligned} &\underset{\bar{\mu}_1, \dots, \bar{\mu}_{|I|}, \tilde{\mu}_1, \dots, \tilde{\mu}_{|I|}}{\text{minimize}} \quad \sum_{\alpha \in I} f_\alpha(\bar{\mu}_\alpha) + \sum_{\alpha \in I} g_\alpha(\tilde{\mu}_\alpha) \\ &\text{s. t. } \bar{\mu}_1 = \dots = \bar{\mu}_{|I|} = \tilde{\mu}_1 = \dots = \tilde{\mu}_{|I|}. \end{aligned} \quad (30)$$

We can then apply the parallel proximal method (Algorithm 3.1 of Combettes & Pesquet (2008)), which is derived from the classical Douglas-Rachford algorithm (Combettes & Pesquet, 2008), and obtain Algorithm 1. In this splitting algorithm, each function  $f_\alpha$  is used separately via its own proximal operator. The same holds for each function  $g_\alpha$ . Note that

$$\text{prox}_{2|I|\gamma f_\alpha} = \text{prox}_{2|I|\gamma \lambda_\alpha \mathcal{R}_\alpha \circ L_\alpha}$$

and

$$\text{prox}_{2|I|\gamma g_\alpha} = \text{prox}_{2|I|\gamma \iota_{(\mathcal{R}_\alpha^*(\hat{\mu}_n - L_{\text{tot}}(\cdot)) \leq \lambda_\alpha)}}$$

For various popular choices of regularization  $R_\alpha$  these proximal operators have simple closed-form formulas.

This can be seen by applying Lemma 2.4 of [Combettes & Pesquet \(2008\)](#) which states that if  $L$  is a bounded linear operator such that  $L \circ L^* = \kappa \text{Id}$  for some finite  $\kappa > 0$  then

$$\text{prox}_{h \circ L} = \text{Id} + \frac{1}{\kappa} L^* \circ (\text{prox}_{\kappa h} - \text{Id}) \circ L.$$

and by noting that  $L_\alpha$  and  $L_{\text{tot}}$  are such bounded linear operators.

---

**Algorithm 1** Parallel proximal algorithm

---

**Initialization:**  $\gamma > 0$ ,  $(\bar{\mu}_\alpha^0)_{\alpha \in I}$  and  $(\tilde{\mu}_\alpha^0)_{\alpha \in I}$   
Set  $\mu^0 = \frac{1}{2|I|} \sum_{\alpha \in I} (\bar{\mu}_\alpha^0 + \tilde{\mu}_\alpha^0)$ .  
**for**  $i = 0, 1, \dots$  **do**  
  **for**  $\alpha \in I$  **do**  
     $\bar{p}_\alpha^i = \text{prox}_{2|I|\gamma f_\alpha} \bar{\mu}_\alpha^i$  and  $\tilde{p}_\alpha^i = \text{prox}_{2|I|\gamma g_\alpha} \tilde{\mu}_\alpha^i$ .  
  **end for**  
   $p^i = \frac{1}{2|I|} \sum_{\alpha \in I} (\bar{p}_\alpha^i + \tilde{p}_\alpha^i)$ .  
   $0 < \rho_i < 2$   
  **for**  $\alpha \in I$  **do**  
     $\bar{\mu}_\alpha^{i+1} = \bar{\mu}_\alpha^i + \rho_i(2p^i - \mu^i - \bar{p}_\alpha^i)$ .  
     $\tilde{\mu}_\alpha^{i+1} = \tilde{\mu}_\alpha^i + \rho_i(2p^i - \mu^i - \tilde{p}_\alpha^i)$ .  
  **end for**  
   $\mu^{i+1} = \mu^i + \rho_i(p^i - \mu^i)$ .  
**end for**

---
